1     **DETECTING TROPICAL SELECTIVE LOGGING WITH SAR DATA**  
2                     **REQUIRES A TIME SERIES APPROACH**

3  
4

5     MG Hethcoat<sup>1,2,3\*</sup>, JMB Carreiras<sup>4</sup>, DP Edwards<sup>2</sup>, RG Bryant<sup>5</sup>, and S Quegan<sup>1</sup>

6  
7

*<sup>1</sup>School of Mathematics and Statistics, University of Sheffield, Sheffield, S3 7RH, UK*

8     <sup>2</sup>*Department of Animal and Plant Sciences, University of Sheffield, Sheffield S10 2TN, UK*

9     <sup>3</sup>*Grantham Centre for Sustainable Futures, University of Sheffield, Sheffield S10 2TN, UK*

10    <sup>4</sup>*National Centre for Earth Observation, University of Sheffield, Sheffield, S3 7RH, UK*

11    <sup>5</sup>*Department of Geography, University of Sheffield, Sheffield, S3 7ND, UK*

12  
13

*\*Corresponding Author*

14    HethcoatMG@gmail.com

15  
16  
17  
18  
19  
20  
21  
22  
23  
24  
25

26 **Abstract:** Selective logging is the primary driver of forest degradation in the tropics and reduces the  
27 capacity of forests to harbour biodiversity, maintain key ecosystem processes, sequester carbon, and  
28 support human livelihoods. While the preceding decade has seen a tremendous improvement in the  
29 ability to monitor forest disturbances from space, advances in forest monitoring have almost  
30 universally relied on optical satellite data from the Landsat program, whose effectiveness is limited in  
31 tropical regions with frequent cloud cover. Synthetic aperture radar (SAR) data can penetrate clouds  
32 and have been utilized in forest mapping applications since the early 1990s, but no study has  
33 exclusively used SAR data to map tropical selective logging. A detailed selective logging dataset from  
34 three lowland tropical forest regions in the Brazilian Amazon was used to assess the effectiveness of  
35 SAR data from Sentinel-1, RADARSAT-2 and PALSAR-2 for monitoring tropical selective logging.  
36 We built Random Forest models in an effort to classify pixel-based differences in logged and  
37 unlogged areas. In addition, we used the BFAST algorithm to assess if a dense time series of Sentinel-  
38 1 imagery displayed recognizable shifts in pixel values after selective logging. Random Forest  
39 classification with SAR data (Sentinel-1, RADARSAT-2, and ALOS-2 PALSAR-2) performed  
40 poorly, having high commission and omission errors for logged observations. This suggests little to  
41 no difference in pixel-based metrics between logged and unlogged areas for these sensors. In contrast,  
42 the Sentinel-1 time series analyses indicated that areas under higher intensity selective logging ( $> 20$   
43  $\text{m}^3 \text{ha}^{-1}$ ) show a distinct spike in the number of pixels that included a breakpoint during the logging  
44 season. BFAST detected breakpoints in 50% of logged pixels and exhibited a false alarm rate of  
45 approximately 10% in unlogged forest. Overall our results suggest that SAR data can be used in time  
46 series analyses to detect tropical selective logging at high intensity logging locations within the  
47 Amazon ( $> 20 \text{m}^3 \text{ha}^{-1}$ ). These results have important implications for current and future abilities to  
48 detect selective logging with freely available SAR data from SAOCOM 1A, the planned continuation  
49 missions of Sentinel-1 (C and D), ALOS PALSAR-1 archives (expected to be opened for free access  
50 in 2020), and the upcoming launch of NISAR.

51

52 **Keywords:** ALOS-2; Brazil; Degradation; Forest disturbance; PALSAR-2; RADARSAT-2; Random  
53 Forest; Selective logging; Sentinel-1; Synthetic aperture radar; Time series; Tropical forest

54 **1. Introduction**

55 Selective logging is the primary driver of forest degradation in the tropics (Curtis et al., 2018;  
56 Hosonuma et al., 2012). Logging reduces the capacity of forests to harbour biodiversity, maintain key  
57 ecosystem processes, sequester carbon, and support human livelihoods (Baccini et al., 2017; Barlow  
58 et al., 2016; Lewis et al., 2015). However, large uncertainties remain in assessing the true impact of  
59 selective logging because the technological advances in detecting and monitoring logging at large  
60 scales are only just emerging (Hethcoat et al., 2019). The ability to reliably map forest degradation  
61 from selective logging is a key element in understanding the terrestrial portion of the carbon budget  
62 and the role of land-use in turning tropical forests into net carbon emitters (Baccini et al., 2017). In  
63 addition, reliable forest monitoring systems are urgently needed for tropical nations and conservation  
64 groups seeking to report and/or mitigate carbon emissions through improved forest stewardship  
65 (GOFC-GOLD, 2016).

66 While the preceding decade has seen a tremendous improvement in the ability to detect forest  
67 disturbances from space (Hansen et al., 2013; Hethcoat et al., 2019; Tyukavina et al., 2017), advances  
68 in forest monitoring have almost universally relied on optical satellite data from the Landsat program.  
69 Yet, the effectiveness of optical data is limited in tropical regions with frequent cloud cover like the  
70 northwest Amazon and central Africa. Synthetic aperture radar (SAR) data can penetrate clouds and  
71 have been utilized in forest mapping applications since the early 1990s (reviewed in Koch, 2010).  
72 However, the SAR data archives are spatially and temporally fragmented, and in many cases the data  
73 products required commercial licences for their use. Consequently, uptake by users has been more  
74 limited than optical data and the full potential of SAR has likely been under-utilized (Reiche et al.,  
75 2016).

76 SAR backscatter, particularly at L- and P-band, is sensitive to changes in carbon stocks in  
77 forests with biomass  $< 300 \text{ Mg ha}^{-1}$  (Koch, 2010; Mitchard et al., 2009; Saatchi et al., 2011). This  
78 enables accurate differentiation between forested and non-forested areas and has been well studied  
79 (e.g. Shimada et al., 2014). More recently, polarimetric and interferometric methods have been  
80 developed that utilize information in the SAR signal to detect forest changes (Deutscher et al., 2013;  
81 Flores-Anderson et al., 2019; Lei et al., 2018; Mathieu et al., 2013). Yet, the limited temporal and

82 spatial coverage of SAR data have hampered widespread application and use of these techniques to  
83 monitor forest disturbances (e.g. single-pass interferometric SAR is only available with TanDEM-X  
84 data). Moreover, advancements in monitoring selective logging with SAR data are generally lacking,  
85 despite widespread recognition of both the need and the role it could play (Mitchell et al., 2017;  
86 Reiche et al., 2016).

87 The launch of Sentinel-1A in mid-2014 represented the first continuous global acquisition  
88 strategy for open SAR data. Since that time two studies have exclusively used Sentinel-1 to map  
89 deforestation (Antropov et al., 2016; Delgado-Aguilar et al., 2017), with others utilizing a fusion of  
90 optical and SAR data (Joshi et al., 2016; Reiche et al., 2018a, 2018b, 2015). While methods that fuse  
91 optical and Sentinel-1 have been successful, their continued dependence on optical imagery  
92 nevertheless limits their utility in regions with frequent cloud cover. With the successful launch of  
93 SAOCOM 1A in late 2018, the planned continuation of the Sentinel-1 missions (with C and D), and  
94 the anticipated launches of SAOCOM 1B in 2019 and NISAR in 2021, vast amounts of free C- and L-  
95 band SAR data will soon be available. Accordingly, methods are needed that utilize SAR data for  
96 large-scale forest monitoring, yet no study has used Sentinel-1 for detection of selective logging  
97 activities.

98 The primary objective of this paper was to assess the ability of Sentinel-1 to detect tropical  
99 selective logging. Detailed spatial and temporal logging records from three regions in Brazil were  
100 used to develop and test the effectiveness of two different detection techniques: (1) exploiting pixel-  
101 based differences between logged and unlogged locations in single images and (2) detecting change in  
102 a time series of pixels known to be logged.

103 Pixel-based methods for detecting changes in remotely sensed imagery often utilize  
104 differences between pixel values or other mathematically derived metrics in time or space, for  
105 example before and after some disturbance or in areas known to be disturbed and undisturbed within  
106 the same image (reviewed in Hussain et al., 2013). These differences can be used for classification,  
107 employed in machine learning, or analyzed temporally to map change. Recently, the detection of  
108 selectively logged regions in single images has been demonstrated successfully with optical data from  
109 Landsat (Hethcoat et al. 2019). Accordingly, we sought to evaluate whether similar methods could be

110 transferred to SAR data. The selective logging records were used to build supervised machine  
111 learning models to detect selective logging. Machine learning methods have many applications in  
112 remote sensing and have been used with increasing frequency and success (Lary et al., 2018). We  
113 performed equivalent analyses with SAR data from the C-band RADARSAT-2 and L-band PALSAR-  
114 2 sensors to compare the performance of longer wavelength (i.e. L-band PALSAR-2) and higher  
115 resolution data (both RADARSAT-2 and PALSAR-2 have higher sensor resolution).

116 In addition, we used all the available Sentinel-1 archives in a time series analysis to monitor  
117 pixel values for breakpoints in the time series of locations that had been selectively logged. Time  
118 series methods have increasingly been used for monitoring changes in pixel values, in part because of  
119 the availability of vast archives of imagery on cloud computing platforms like Google Earth Engine  
120 (Gorelick et al., 2017), but also because of the recognition that seasonal or longer term trends in pixel  
121 values can be less susceptible to erroneously characterizing change (Bullock et al., 2018; Verbesselt et  
122 al., 2012; Zhu, 2017). Given that forest disturbances from selective logging are often subtle and short-  
123 lived, detecting changes with SAR data over large regions will present technological and algorithmic  
124 challenges. However, a critical assessment of detection capabilities and a careful understanding of the  
125 performance of these data types is essential for advancing forest monitoring techniques in the tropics.

126

## 127 **2. Study area and data**

### 128 *2.1. Study area and selective logging data*

129 Selective logging data from three lowland tropical forest regions in the Brazilian Amazon were used  
130 in this study (Figure 1). The Jacunda and Jamari regions are inside the Jacundá and Jamari National  
131 Forests, Rondônia, while the Saraca region is inside the Saracá-Taquera National Forest, Pará. Forest  
132 inventory data from 14 forest management units (FMUs) selectively logged between 2012 and 2017  
133 were used, comprising over 32,000 individual tree locations. Unlogged data from three additional  
134 locations, one inside each study region, comprised over 11,500 randomly selected point locations  
135 known to have remained unlogged during the study period (Table 1).

136

### 137 *2.2. Satellite data and pre-processing*

138 All available C-band Sentinel-1A Ground Range Detected scenes in descending orbit and  
139 Interferometric Wide mode (VV and VH) were utilized in Google Earth Engine (GEE) over the study  
140 regions through November 2018. These had incidence angles of  $38.7^\circ$ , and  $38.7^\circ$ , and  $31.4^\circ$  for  
141 Jacunda, Jamari and Saraca, respectively. GEE is a cloud computing platform hosting calibrated,  
142 ortho-corrected Sentinel-1 scenes that have been processed in the following steps using the Sentinel-1  
143 Toolbox: (1) thermal noise removal; (2) radiometric calibration; and (3) terrain correction using the  
144 Shuttle Radar Topography Mission (SRTM) 30 m digital elevation model (DEM). The resulting  
145 images had a pixel size of 10 m.

146 Single Look Complex C-band RADARSAT-2 scenes in Fine mode (HH and HV) were  
147 obtained from the Canadian Space Agency. Twelve ascending scenes, with an incidence angle of  
148  $30.7^\circ$ , coincided with selective logging records and were acquired between 2011 and 2012. Pre-  
149 processing of images was done with the Sentinel-1 Toolbox and included: (1) radiometric calibration;  
150 (2) multi-looking (by a factor of 2 in azimuth) to produce square pixels; and (3) terrain correction  
151 using the SRTM 30 m DEM. The resulting images had a pixel size of 10 m.

152 Level 2.1 L-band PALSAR-2 scenes (HH and HV) were obtained from the Japan Aerospace  
153 Exploration Agency (JAXA) with a pixel size of 6.25 m. Four geometrically corrected scenes  
154 coincided with selective logging records and were acquired between 2016 and 2017 with incidence  
155 angles of  $28.5^\circ$  in ascending orbit. Image digital number was converted to normalized backscatter  
156 using the calibration factors provided by JAXA.

157

### 158 *2.3. Speckle filtering*

159 SAR data are inherently speckled from interference between scattering objects on the ground  
160 (Woodhouse, 2017) and often require reduction of speckle prior to analyses. Many speckle-reduction  
161 methods involve spatial averaging, but the associated loss of spatial resolution was likely to hinder the  
162 detection of the subtle signal from selective logging activities. Thus, following the SAR pre-  
163 processing steps detailed above for each data type, the final step involved multi-temporal filtering to  
164 reduce speckle (Quegan and Yu, 2001). Multi-temporal filtering reduces speckle by averaging a  
165 pixel's speckle through time (as opposed to a spatial average). A 7x7 pixel window was used. The

166 equivalent number of looks after speckle filtering for Sentinel-1, RADARSAT-2 and PALSAR-2 was  
167 approximately 15, 5 and 5, respectively.

168

169

170

171

172

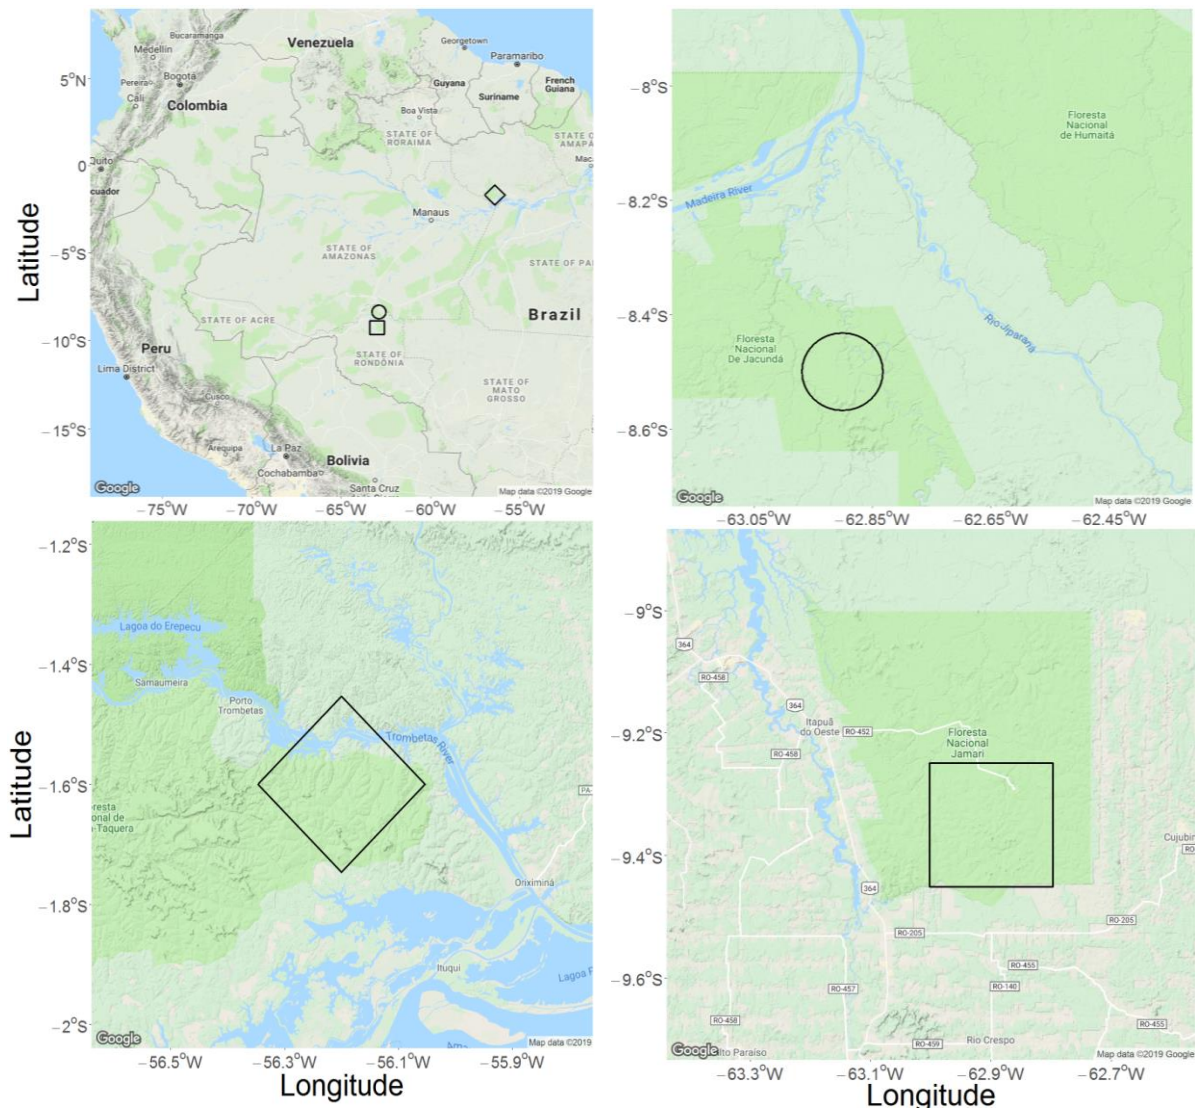

**Figure 1.** Location of the Jacunda (circle), Jamari (square), and Saraca (diamond) study regions in the Brazilian Amazon.

173

174 **Table 1.** Data used in the classification of selective logging from three study regions in the Brazilian  
 175 Amazon. The forest management unit (FMU), logging intensity, sample size (pixels), and overlap  
 176 with satellite data coverage are shown for Sentinel-1 (S), RADARSAT-2 (R), and PALSAR-2 (P).

| FMU             | Logging Intensity<br>(m <sup>3</sup> ha <sup>-1</sup> ) | N     | Coverage   |
|-----------------|---------------------------------------------------------|-------|------------|
| Jacunda_I_2016  | 6                                                       | 2,290 | S          |
| Jacunda_I_2017  | 9                                                       | 2,822 | S          |
| Jacunda_II_2015 | 15                                                      | 2,613 | S          |
| Jacunda_II_2016 | 10                                                      | 1,815 | S          |
| Jacunda_II_2017 | 7                                                       | 1,310 | S, R*      |
| Jacunda_Reserve | 0                                                       | 3,000 | S*, R*     |
| Jamari_I_2015   | 22                                                      | 1,094 | S, R*      |
| Jamari_I_2016   | 10                                                      | 653   | S, R*      |
| Jamari_I_2017   | 12                                                      | 911   | S, R*      |
| Jamari_III_2012 | 10                                                      | 3,071 | R          |
| Jamari_III_2015 | 11                                                      | 3,042 | S, R*      |
| Jamari_III_2016 | 9                                                       | 2,058 | S, R*, P   |
| Jamari_III_2017 | 11                                                      | 2,597 | S, R*, P   |
| Jamari_Reserve  | 0                                                       | 5,912 | S*, R*, P* |
| Saraca_Ia_2017  | 12                                                      | 3,769 | S          |
| Saraca_II_2016  | 25                                                      | 3,223 | S          |
| Saraca_II_2017  | 21                                                      | 4,729 | S          |
| Saraca_Reserve  | 0                                                       | 3,000 | S*         |

177 \* FMU was unlogged at time of acquisition and data represent unlogged observations

178

179

180

181

182



### 183 3. Methods

#### 184 3.1. Supervised classification with Random Forest

##### 185 3.1.1. Data inputs for classifying selective logging

186 For each satellite data type (Sentinel-1, RADARSAT-2, and PALSAR-2) data were extracted at each  
187 pixel where logging occurred and randomly selected pixels in nearby regions that remained unlogged.  
188 Thus, the data inputs for logged and unlogged observations came from a single scene for each study  
189 region (i.e. a space-for-time study design in contrast to images before and after logging from the same  
190 location). Selective logging at the study areas only occurred during the dry season, approximately  
191 June-October in a given year, and data were extracted from images acquired as late into the logging  
192 period as possible (Table S1) to ensure the majority of pixels had been subjected to logging, but also  
193 before the onset of the rainy season (Hethcoat et al., 2019). In addition, logging activities tend to be  
194 accompanied by surrounding disturbances (canopy gaps, skid trails, patios, and logging roads)  
195 resulting in forest disturbances beyond just the pixels where a tree was removed. Accordingly seven  
196 texture measures were calculated for each polarization (sum average, sum variance, homogeneity,  
197 contrast, dissimilarity, entropy, and second moment) to provide a local context for each pixel  
198 (Haralick et al., 1973). These were calculated within a 7x7 pixel window, chosen as a trade-off  
199 between minimizing window size while still capturing the variability in selectively logged forests  
200 compared to unlogged forests. Finally, a composite band was calculated as the ratio of the co-  
201 polarized channel to the cross-polarized channel (i.e. HH/HV or VV/VH). Each dataset thus  
202 comprised a 17-element vector (2 polarization bands, their ratio composite band, and 7 texture  
203 measures for each polarization) for each pixel where logging occurred and randomly selected pixels  
204 that remained unlogged.

205

##### 206 3.1.2. Random Forests for classification of selective logging

207 We built Random Forest (RF) models using the *randomForest* package in program R version 3.5.1  
208 (Liaw and Wiener, 2002; R Development Core Team, 2018). The RF algorithm (Breiman, 2001a) is  
209 an ensemble learning method for classification. Each dataset was split into 75% for training and 25%  
210 was withheld for validation. In order to further ensure the independence of training and validation

211 datasets, the validation data were spatially filtered such that no observations in the training dataset  
 212 were within 90 m of an observation in the validation dataset. RF models have two tuning parameters:  
 213 the number of classification trees grown ( $k$ ), and the number of predictor variables used to split a node  
 214 into two sub-nodes ( $m$ ). We used a cross-validation technique to identify the number of trees and the  
 215 number of variables to use at each node that minimized the out-of-bag error rate on each training  
 216 dataset (Table S2). The importance of each predictor variable was assessed during model training,  
 217 using Mean Decrease in Accuracy, defined as the decrease in classification accuracy associated with  
 218 not utilizing that particular input variable for classification (Breiman, 2001b).

219

### 220 3.1.3. Model validation: assessing accuracy

221 RF models were validated using a random subset of the full dataset for each sensor (described in  
 222 Section 3.1.2). By default, RF models assign an observation to the class indicated by the majority of  
 223 decision trees (Breiman, 2001a). However, the proportion of trees that voted for a particular class  
 224 from the total set of trees can be obtained for each observation and a classification threshold can be  
 225 applied to this proportion (Hethcoat et al., 2019; Liaw and Wiener, 2002). We adopted such an  
 226 approach, wherein the proportion of trees that predicted each observation to be logged, informally  
 227 termed the *likelihood* a pixel was logged, was used to select the classification threshold. A threshold,  
 228  $T$ , was defined such that if *likelihood*  $> T$  the pixel was classified as logged (Figure 2).

229 The confusion matrix then has the form:

|           |    | Reference   |                   |
|-----------|----|-------------|-------------------|
|           |    | L           | UL                |
| Predicted | L  | $D_L$       | $D_{UL}$          |
|           | UL | $N_L - D_L$ | $N_{UL} - D_{UL}$ |

230

231 where L and UL refer to logged and unlogged classes,  $N_L$  and  $N_{UL}$  are the numbers of logged and  
 232 unlogged observations in the reference dataset, and  $D_L$  and  $D_{UL}$  are the numbers of logged and  
 233 unlogged pixels detected as logged, respectively. We defined the *detection rate*  $DR = D_L/N_L$  and  
 234 *false alarm rate*  $FAR = D_{UL}/N_{UL}$  as the frequency that a logged or unlogged pixel was classified as  
 235 logged, respectively. Thus, the DR is equivalent to 1 minus the omission error of the logged class and

236 the FAR is the omission error of the unlogged class. In addition, we defined the *false discovery rate*  
237 (FDR):

$$238 \quad \text{FDR} = \frac{D_{UL}}{D_L + D_{UL}} = 1 - \frac{1}{1 + \left(\frac{N_{UL}}{N_L}\right) \left(\frac{\text{FAR}}{\text{DR}}\right)}. \quad (1)$$

239 The FDR is the proportion of all observations that were detected as logged that were actually  
240 unlogged, and is equivalent to the commission error of the logged class. The FDR is an assessment of  
241 the rate of prediction error (i.e. type I) when labelling pixels as logged and can be used in detection  
242 problems with rare events or unbalanced datasets, such as selectively logged pixels within the  
243 Amazon Basin (Benjamini and Hochberg, 1995; Hethcoat et al., 2019; Neuvial and Roquain, 2012). A  
244 high DR and low FDR is clearly desirable, but these cannot be fixed independently in two-class  
245 detection problems and both depend on the threshold value (Figure 2). For example, if achieving a  
246 95% detection rate led to a FDR of 50%, then half of all predictions of logging would be incorrect.  
247 This level of performance would make estimates of selective logging extremely uncertain. The value  
248 of the classification threshold ( $T$ ) therefore represents a trade-off between true and false detections. In  
249 practice, a viable detection method would expect to achieve a  $\text{DR} > 50\%$  while limiting the FDR to  
250 10-20% to have any value for widespread forest monitoring. The performance of each sensor was  
251 assessed by plotting the DR, FAR and FDR values as  $T$  varied from 0 to 1 to facilitate discussion of  
252 model performance.

253

$$DR = \frac{D}{B + D}$$

$$FAR = \frac{C}{A + C}$$

$$FDR = \frac{C}{C + D}$$

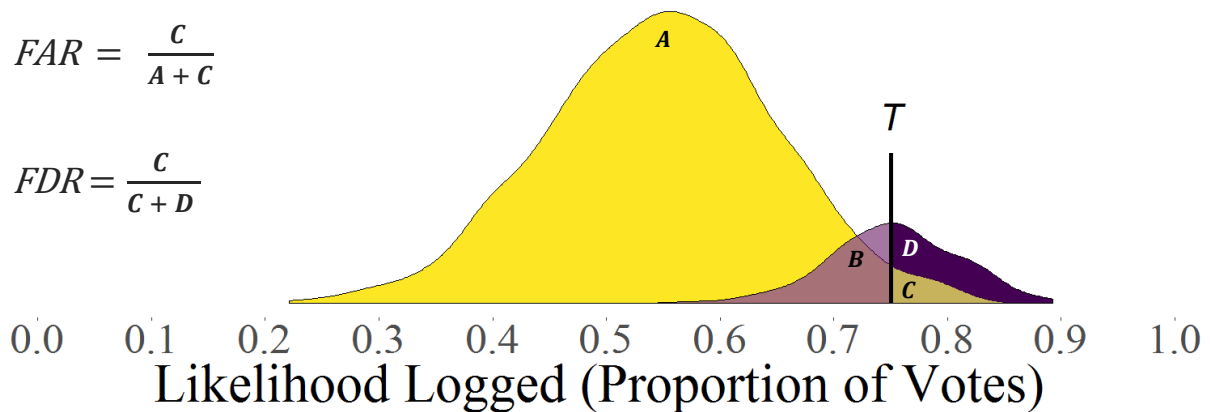

**Figure 2.** Diagram representing the trade-off between the detection rate (DR) and the false alarm rate (FAR) associated with using a threshold  $T$  (vertical black line) to label pixels as logged and unlogged based upon the proportion of votes that each observation was predicted to be logged. The purple and yellow colors correspond to density plots for hypothetical logged and unlogged observations, respectively. Thus, the areas A and B are the portions of the observations from unlogged and logged pixels, respectively, that will be labelled as unlogged. Similarly, C and D represent the portions of the observations from logged and unlogged pixels, respectively, that will be labelled as logged.

254

#### 255 *3.1.4. Sentinel-1 classification of high intensity logging*

256 Most of the selective logging data in this study were low-intensity ( $<15 \text{ m}^3 \text{ ha}^{-1}$ ) and we anticipated

257 the logging signal to be weak and difficult to detect. Consequently, we also considered a reduced

258 Sentinel-1 dataset that included only those FMUs with logging intensities above  $20 \text{ m}^3 \text{ ha}^{-1}$  ( $n = 3$

259 sites) and the unlogged data ( $n = 3$  sites) to assess if Sentinel-1 could be used for detecting selective

260 logging activities near the legal limit within the Brazilian Legal Amazon. Unfortunately

261 RADARSAT-2 and PALSAR-2 imagery did not cover the highest intensity logging sites, so we could

262 not perform equivalent analyses with these datasets. RF classification and validation was performed

263 on this subset of the Sentinel-1 data in the manner detailed above for the full dataset.

264

#### 265 *3.2. Time series analyses*

266 We tested whether a time series of Sentinel-1 data displayed discernible changes in pixel values after

267 selective logging with the BFAST algorithm (Verbesselt et al., 2012, 2010) in program R (R Core

268 Team, 2018). BFAST estimates the timing of abrupt changes within a time series (breakpoint  
269 hereafter) and has been successfully utilized with a range of data types (e.g. Landsat, MODIS, SAR,  
270 etc.). The metrics used in searching for breakpoints in the full Sentinel-1 time series (approximately  
271 55 scenes from October 2016 – August 2018) were the two most important predictor variables  
272 identified from RF models. The limited temporal coverage of RADARSAT-2 and PALSAR-2 at our  
273 study sites precluded time series analyses with these datasets. BFAST was used to assess if a suitable  
274 model with one or no breakpoints was appropriate and included tests for coefficient and residual-  
275 based changes in the expected value (i.e. the conditional mean). Where breakpoints were identified,  
276 we determined if they coincided with the timing of selective logging activities (June – October) and  
277 regarded these as true detections. Breakpoints in unlogged areas and breakpoints outside the timing of  
278 logging activities were considered false detections. In addition, the relationship between the frequency  
279 of breakpoints within an FMU and its logging intensity was examined to understand potential  
280 thresholds in logging intensity above which variables could be used to monitor selective logging  
281 activities through time series analyses.

282 Finally, we examined if the relationship between logging intensity and the rate of detections  
283 and false alarms was consistent between logging locations (i.e. a scattered subset of pixels in an area)  
284 and an entire region (i.e. all pixels within a bounding box). The timing of breakpoints was mapped for  
285 two 500 m X 500 m test regions within the Saraca study area (one logged and one unlogged). A  
286 limited number of small test regions were chosen because of the computationally expensive nature of  
287 the pull request in Earth Engine (e.g. two 1 km regions query > 1 million records for export). Only  
288 breakpoints during the time period associated with logging were mapped (June – October).

289

## 290 **4. Results**

### 291 *4.1. Random Forest classification of selective logging*

292 The single-image detection results for all sensors revealed that in order to get false discovery rate  
293 (FDR) values sufficiently low (e.g. 10-20%), the corresponding detection rates (DR) of selective  
294 logging were of almost no value (< 5%) for reliably forest monitoring. In general, the following  
295 results suggest that regions that have experienced selective logging do not show consistent differences

296 from unlogged areas in the metrics we used for classification. The second analysis (section 4.2)  
297 therefore deals with detection of selective logging with time series data and provides better results.

298

#### 299 *4.1.1. Sentinel-1*

300 Random Forest detection performance for Sentinel-1 is shown in Figure 3 (top). Both the detection  
301 and false alarm rates were close to 1 until the threshold exceeds ~0.4, meaning almost every pixel in  
302 an image would be detected as logged. This suggests difficulty distinguishing logged and unlogged  
303 observations, and many unlogged observations were being misclassified as logged (Figure S1). In  
304 general, the detection, false alarm, and false discovery rates (across the range of threshold values)  
305 were insufficient for reliable classification of selective logging with Sentinel-1 data at the intensities  
306 within our study areas (6-25 m<sup>3</sup> ha<sup>-1</sup>). For example, even if a FDR of 30% were acceptable, this would  
307 yield a detection rate < 20%, which would be of little practical value. Thus, attempts to strongly limit  
308 the false discovery rate (commission error of logged observations) would require a high threshold  
309 value and result in very few detections. Overall, this suggests that using single images from Sentinel-  
310 1 on their own to detect and map selective logging activities would be fraught with error with the  
311 classification approach used here.

312

#### 313 *4.1.2 .RADARSAT-2*

314 Random Forest performance for RADARSAT-2 is shown in Figure 3 (middle). Both the false alarm  
315 rate and the detection rate rapidly declined as the threshold value was initially increased, again  
316 suggesting difficulty in distinguishing logged and unlogged observations. In contrast to Sentinel-1,  
317 RADARSAT-2 was less likely to label an observation as logged and very few observations had  
318 likelihood values above 0.5 (Figure S2). It should be noted that the logging records that coincided  
319 with RADARSAT-2 data were from a single FMU that was relatively low intensity (10 m<sup>3</sup> ha<sup>-1</sup>).  
320 Consequently, the performance displayed here may not be a full appraisal of RADARSAT-2  
321 capabilities. Given how poorly the model performed, however, it is uncertain that a vast improvement  
322 would occur with better training datasets. Overall, our results suggest that RADARSAT-2 data cannot  
323 be used to effectively monitor low-intensity selective logging activities using pixel-based differences

324 between logged and unlogged areas. However, additional tests with data at higher logging intensities  
325 should be pursued.

326

#### 327 *4.1.3. PALSAR-2*

328 Random Forest classification performance for PALSAR-2 is shown in Figure 3 (bottom). In general,  
329 the performance of PALSAR-2 was equally poor at distinguishing logged and unlogged observations  
330 as RADARSAT-2 and Sentinel-1 (Figure S3). The final rise in the false discovery rate in Figure 3,  
331 before it drops to zero, is the result of calculating proportions from very small sample sizes (e.g. 5 of  
332 10 observations predicted logged were actually unlogged). Similar to RADARSAT-2, the selective  
333 logging data that coincided with PALSAR-2 imagery was from two relatively low-intensity FMUs (9  
334 - 11 m<sup>3</sup> ha<sup>-1</sup>). Again, however, more data at higher logging intensities seems unlikely to improve  
335 classification performance to the desired level. For example when the data from Sentinel-1 was  
336 restricted to just the low intensity sites used in the PALSAR-2 analyses, there was effectively no  
337 change in the rates of detection and false discovery compared to the results from all logging  
338 intensities with Sentinel-1 (Figures S4 and Table S7). Thus, the lack of higher intensity logging data  
339 probably had little impact on the results for PALSAR-2. In general, this suggests that the limitations  
340 in distinguishing logged and unlogged pixels are inherent in the data and metrics we used for  
341 classification (for all three data sets).

342

#### 343 *4.1.4. Sentinel-1 classification of high intensity logging*

344 Detection performance of Sentinel-1 data for the highest intensity FMUs is shown in Figure 4.  
345 Despite limiting the detection task to the most intensively logged FMUs (as well as unlogged  
346 observations), the detection rate and false discovery rate values were comparable to the results that  
347 used the full range of logging intensities. Instead, improvement in model performance was associated  
348 with better discrimination of unlogged observations (i.e. compare the commission and omission errors  
349 for the unlogged class between Tables 2 and 5). Essentially, the model was able to better identify  
350 unlogged forest, presumably because the more “confusing” observations (i.e. the low intensity FMUs)  
351 were absent and could not muddle the distinction between logged and unlogged observations (Figures

352 S5). Overall, our results suggest Sentinel-1 data cannot be used in the classification of pixel-based  
353 differences to monitor selective logging activities with reasonable precision, even at the most  
354 intensively logged regions within the Amazon.



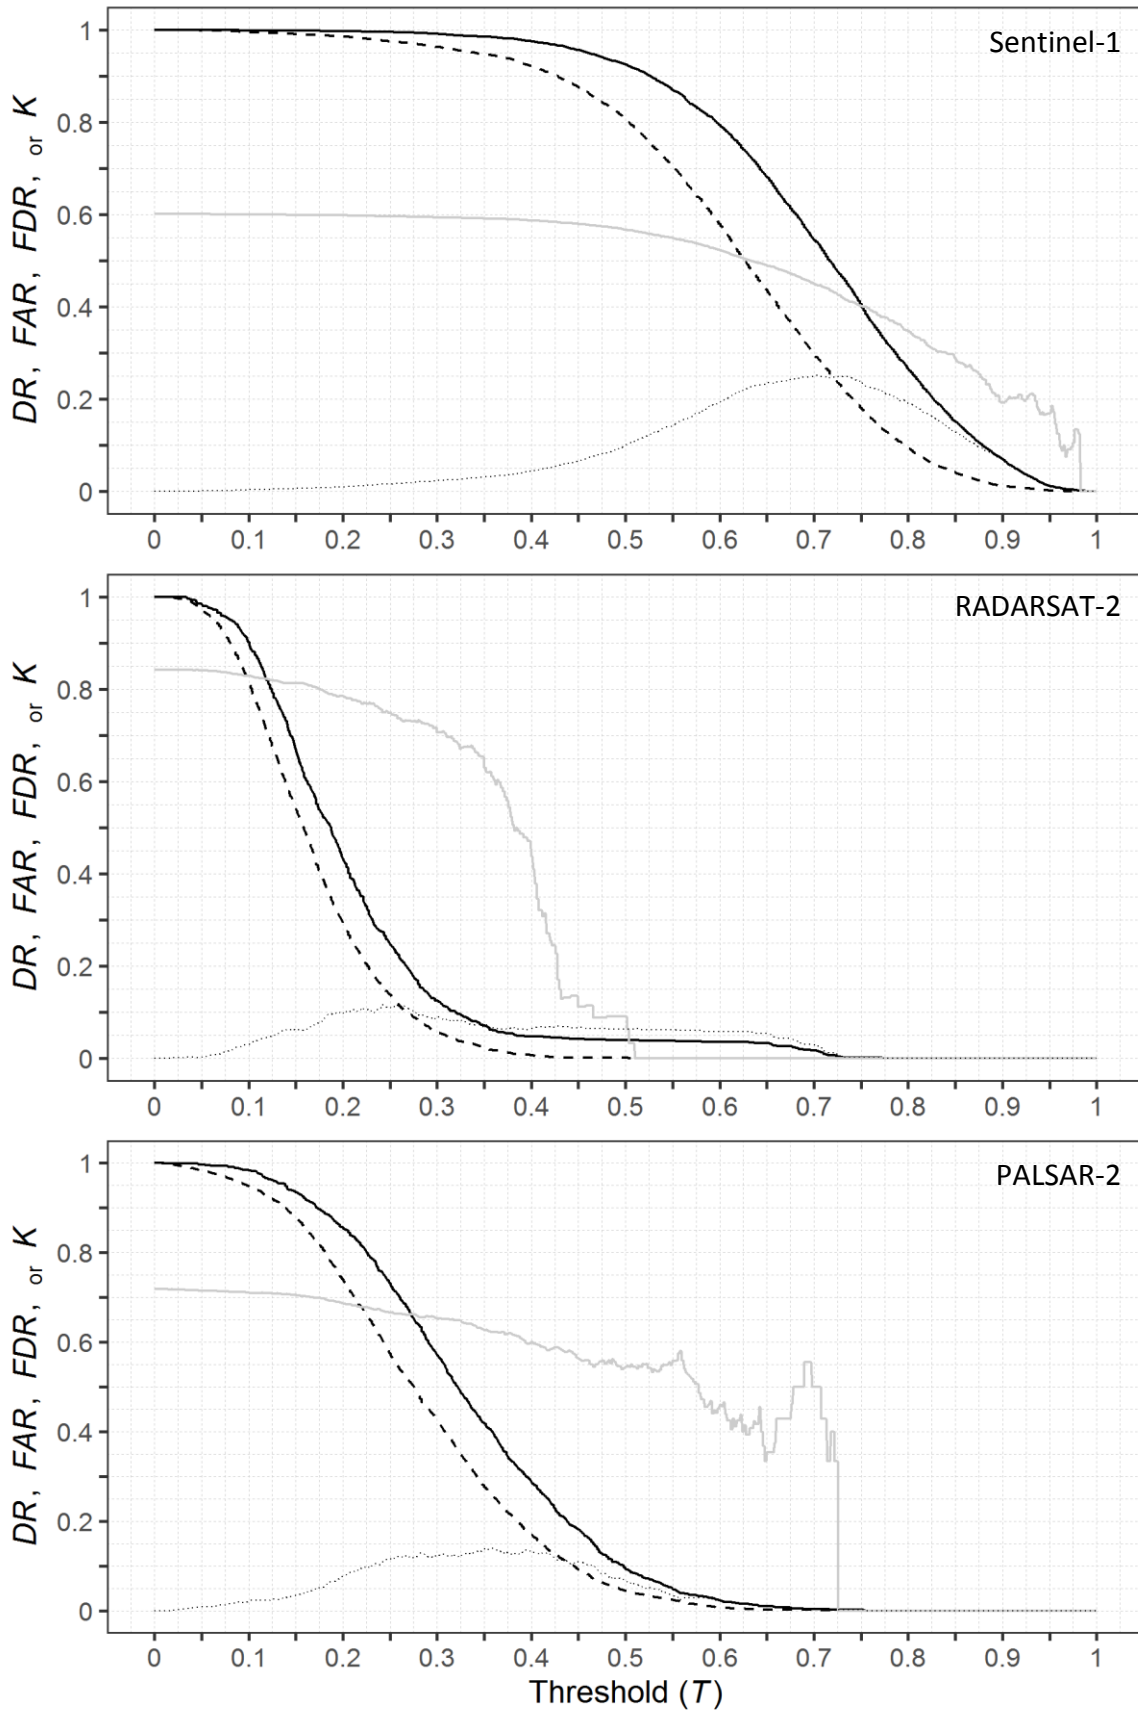

**Figure 3.** Random Forest model performance across the range of threshold values ( $T$ ) for classification with SAR data. The Detection Rate (DR) and False Alarm Rate (FAR) are the solid and dashed black lines, respectively. Also shown are the corresponding values of the False Discovery Rate (FDR) and Cohen's kappa ( $k$ ) as solid and dotted grey lines, respectively.

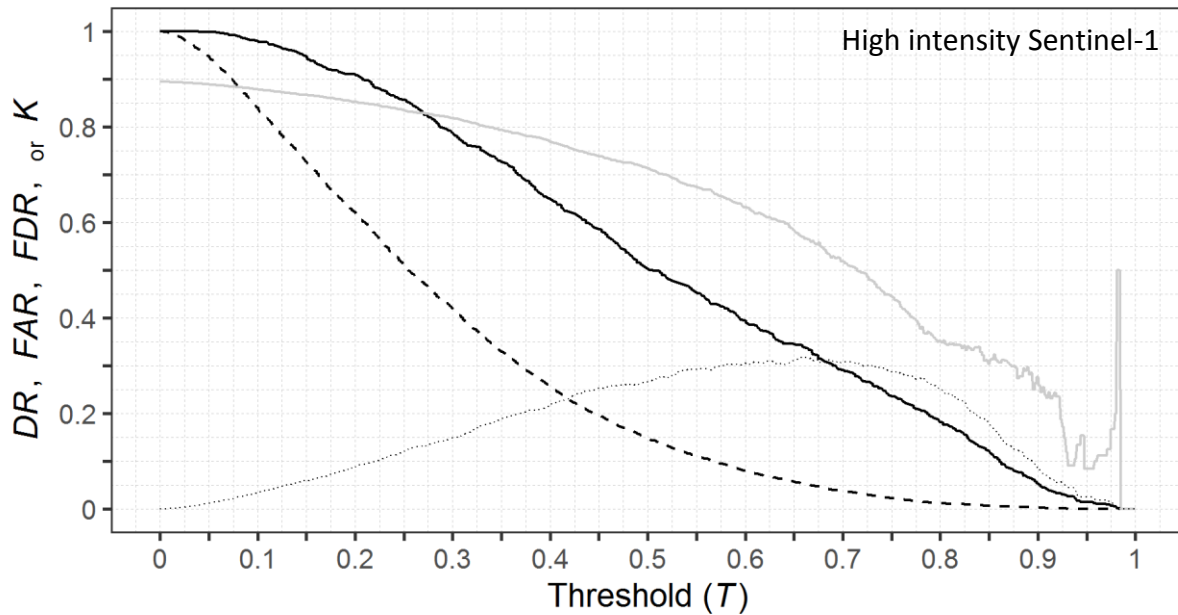

**Figure 4.** Random Forest model performance across the range of threshold values ( $T$ ) for classification of Sentinel-1 data with a subset of the most intensively logged sites. The Detection Rate (DR) and False Alarm Rate (FAR) are the solid and dashed black lines, respectively. Also shown are the corresponding values of the False Discovery Rate (FDR) and Cohen's kappa (solid and dashed grey lines, respectively).

356

357

#### 358 4.2. Sentinel-1 time series analyses

359 The two most important predictor variables from the Sentinel-1 RF model were the Sum Average  
360 metric (Haralick 1973) on the VV and VH bands (Figure S6, Equation S1). A plot of VV sum average  
361 values through time for six randomly selected tree harvest locations at the Saraca site is shown in  
362 Figure 5 and suggests selective logging decreased the value of this metric. In addition, histograms of  
363 the timings associated with all breakpoints at three FMUs are shown in Figure 6 and indicates the time  
364 frame of the breakpoints mainly occurred within the logging season for those FMUs logged above 20  
365  $\text{m}^3 \text{ha}^{-1}$ . In contrast, the time periods associated with breakpoints at lower logging intensities were  
366 shifted toward the onset of the rainy season in late 2017 – early 2018, however, all FMUs showed an  
367 uptick in breakpoints associated with the rainy season (Figure 6). This suggests that Sentinel-1 time  
368 series data could be used to detect and monitor selective logging activities from areas that have  
369 experienced logging close to the legal limit in Brazil ( $30 \text{m}^3 \text{ha}^{-1}$ ), particularly if the detection time-  
370 frame is narrowed to within the known logging season.

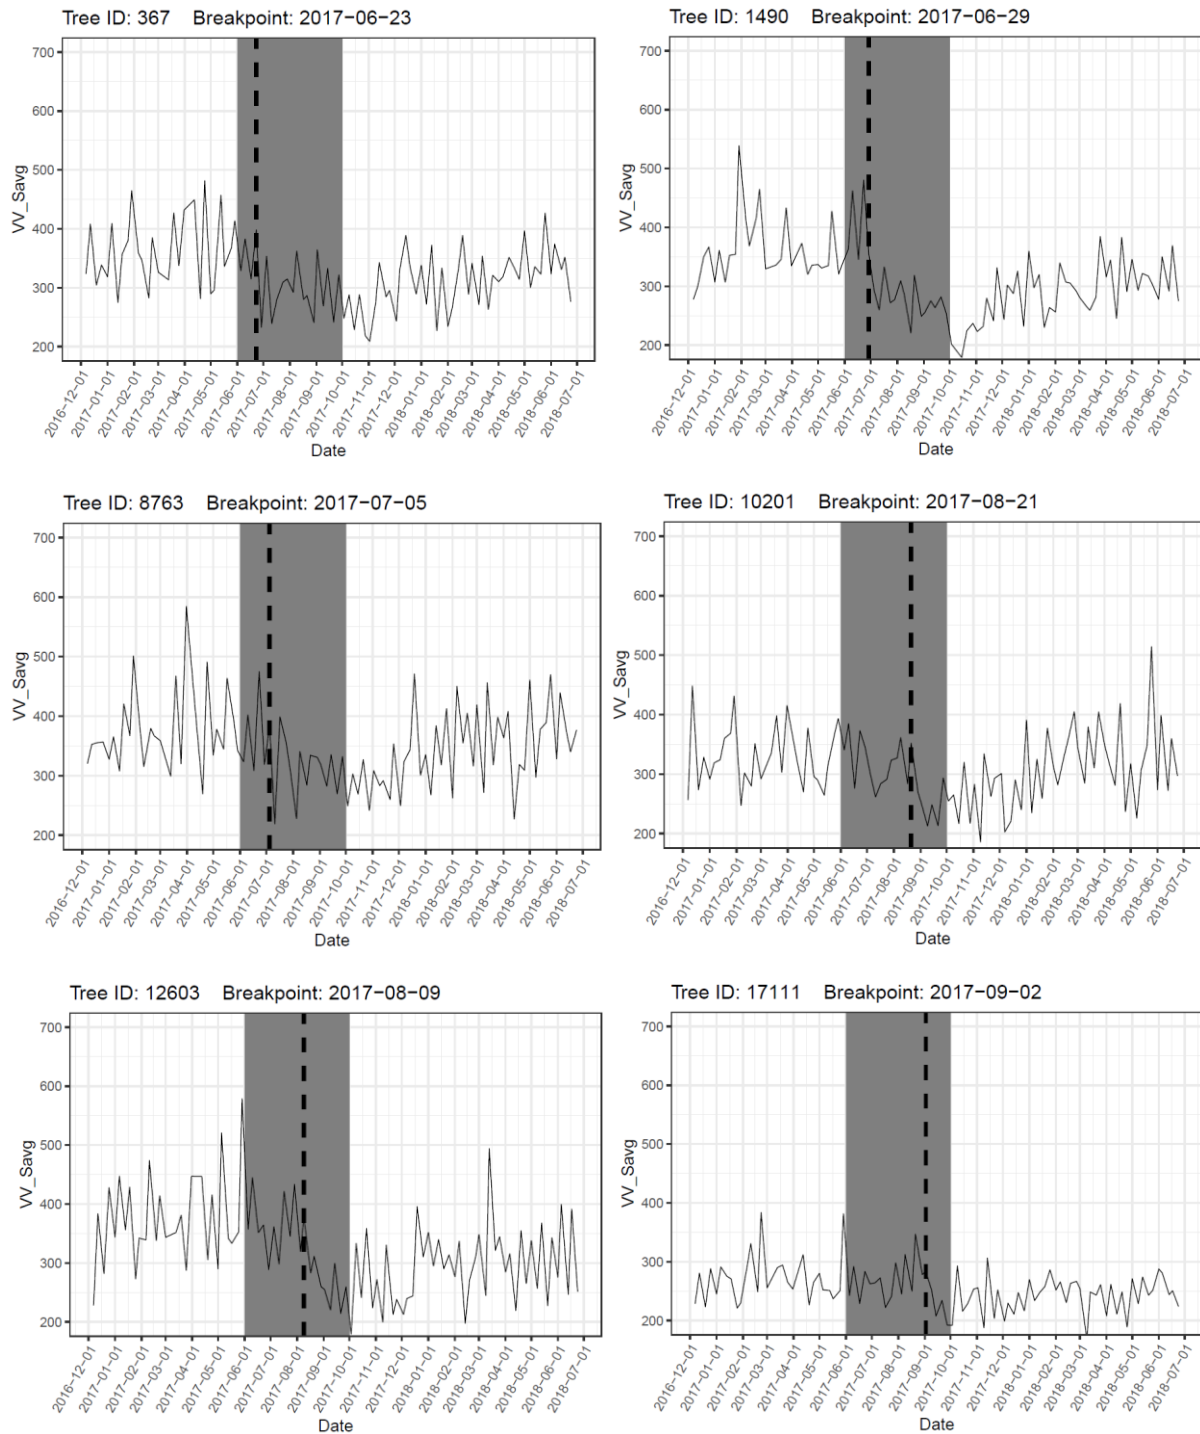

**Figure 5.** Breakpoint dates identified by the BFAST algorithm from six randomly selected points within the Saraca study region. The time series of the VV sum average texture measure is plotted in black, the selective logging period is shaded in grey, and the identified breakpoint date is labelled with a vertical dashed line.

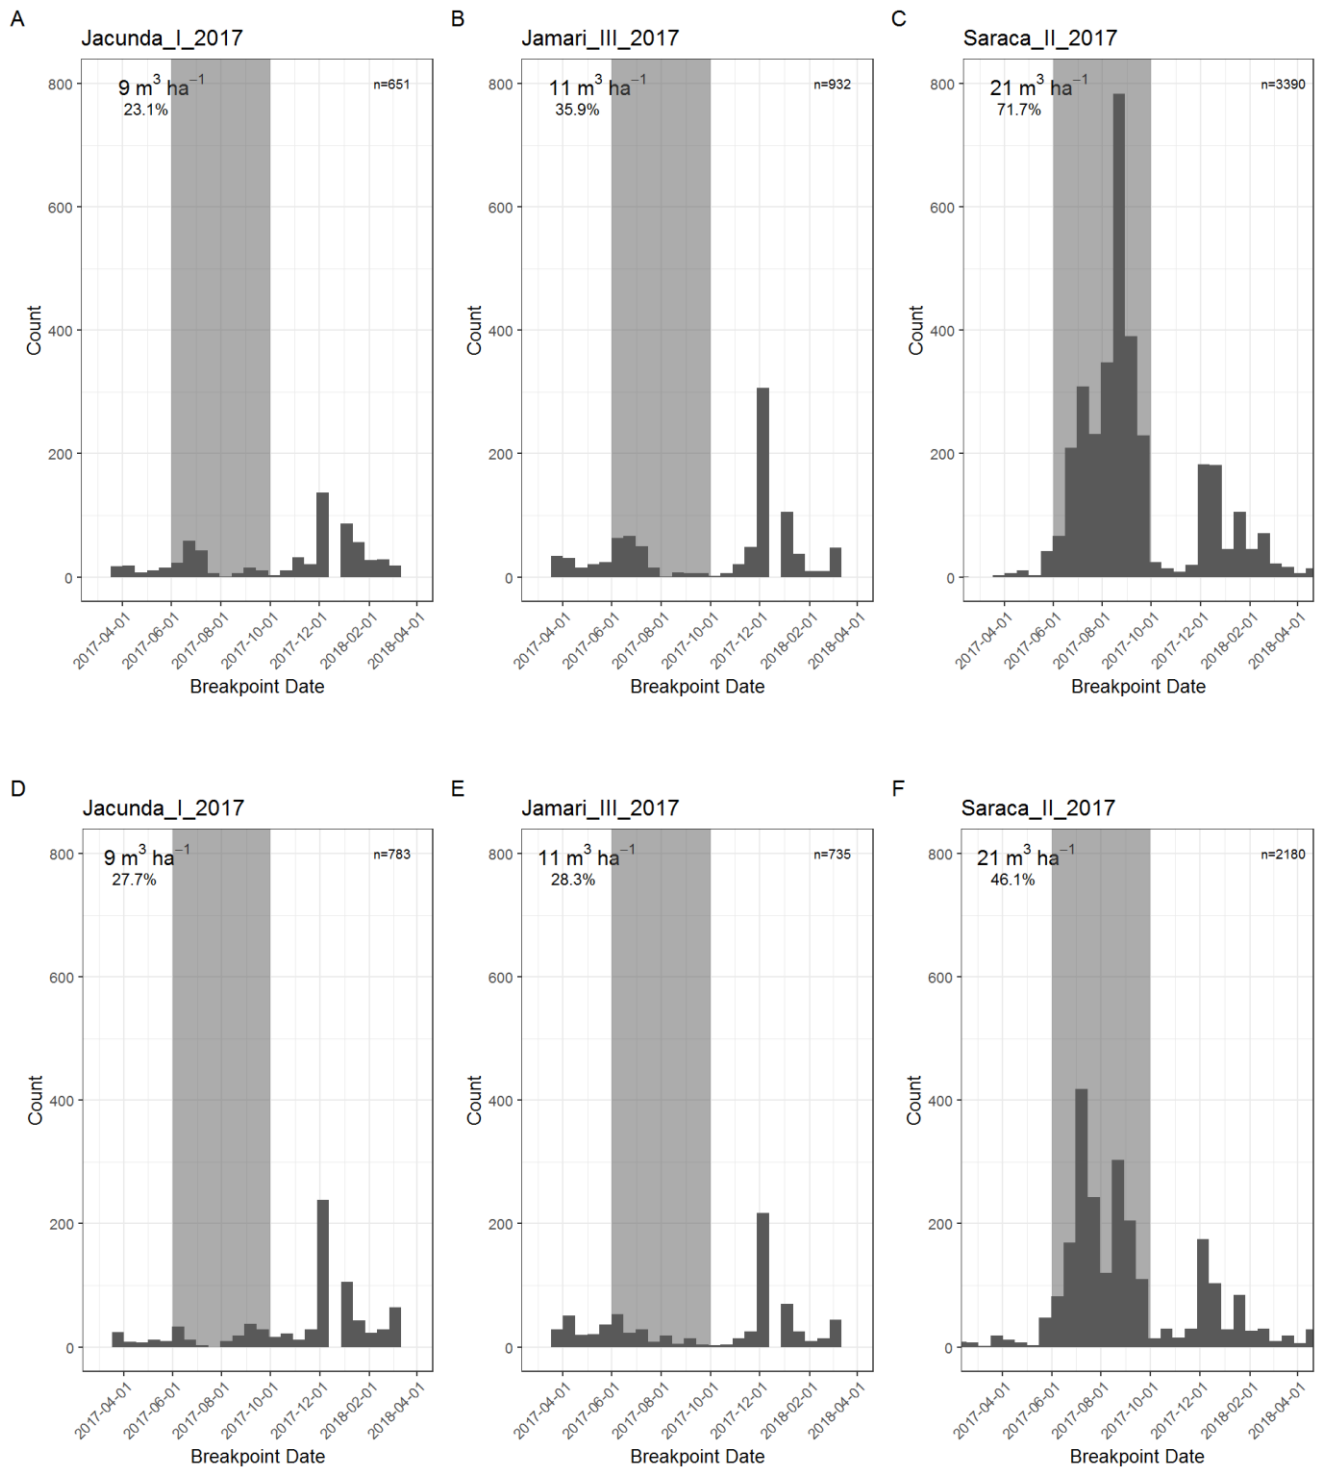

**Figure 6.** Histograms of breakpoint dates associated with time series analyses of the Sentinel-1 sum average texture measure for three study regions in the Brazilian Amazon for the VV (top row) and VH (bottom row) bands. The logging intensity and the proportion of observations with breakpoints in the data are in the upper left of each panel. The time period coinciding with logging activities is shaded in grey.

372

373

374

375           When the value of the VV sum average metric was monitored through time in pixels known  
376 to be logged and unlogged, the proportion of pixels with a significant breakpoint in their time series  
377 increased as the logging intensity of the FMU increased (Figure 7A). Approximately 70% of logged  
378 pixels in high logging intensity FMUs had a breakpoint, however, nearly 25% of unlogged pixels  
379 showed a breakpoint in their time series (i.e. 25% false alarm rate). This false alarm rate was  
380 generally consistent through logging intensities approaching  $15 \text{ m}^3 \text{ ha}^{-1}$  and suggests no signal in  
381 pixels logged at low to moderate intensities (Figure 7A). When the breakpoints were assessed only  
382 over the time period associated with logging (to remove the false peak associated with the rainy  
383 season), the relationship showed a similar pattern whereby the FMUs logged at the highest intensities  
384 showed a large rise in breakpoints above a background false alarm rate that was relatively constant up  
385 through moderate logging intensities (Figure 7B). At the highest intensities, the detection rate was >  
386 50% and the false alarm rate was approximately 10%. These results further support the idea that  
387 FMUs logged at low to moderate intensities do not show a distinct time series signal whereas FMUs  
388 logged at higher intensities do. Overall, this suggests that FMUs logged at intensities closer to the  
389 legal limit within the Brazilian Legal Amazon ( $30 \text{ m}^3 \text{ ha}^{-1}$ ) should show a noticeable spike in the  
390 number of breakpoints within its time series above a background false alarm rate and could be used to  
391 detect logging activities in the dry season.

392           Approximately 55% and 20% of pixels in the logged and unlogged test regions had a  
393 breakpoint during the logging season (Figure 8A and B). These values are generally in agreement  
394 with our prior results from the subset of pixels where trees were removed (see Figure 7B). While 55%  
395 of the pixels in the logged test region did not have a tree removed, selective logging is associated with  
396 forest disturbances that go beyond the individually logged pixels (e.g. canopy gaps, skid trails,  
397 logging roads, etc.) and additional detections are expected. Only about 5% of the pixels in the logged  
398 test region were actually logged, however, it is clear from the Planet imagery (Figure 8C and D;  
399 Planet Team 2017) that more than 5% of the forest patch was disturbed by logging activities. Given  
400 the false alarm rate was around 20%, the difference between detections and false alarms might  
401 represent a value comparable with the amount of forest disturbance expected at this intensity (i.e.  
402 about 30%).

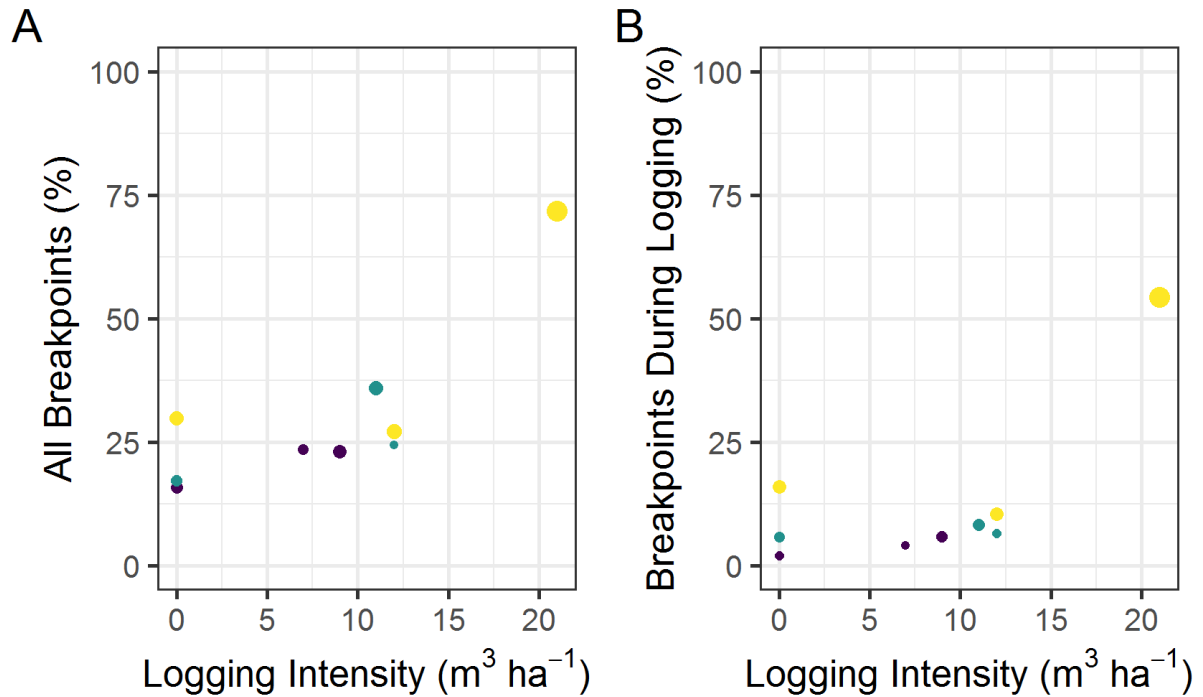

**Figure 7.** The relationship between the proportion of observation within a Forest Management Unit (FMU) that had a breakpoint identified within its Sentinel-1 VV sum average texture measure time series and the logging intensity of the FMU. The proportion of all observations (A) and the proportion that had a breakpoint that coincided with the logging season (B) are shown separately. The circle size corresponds to number of observations at each FMU and yellow, green, and purple colors represent the Saraca, Jamari, and Jacunda sites, respectively. See the supplementary material for the same analyses with the second and third best metric from Random Forest (Figure S7).

403

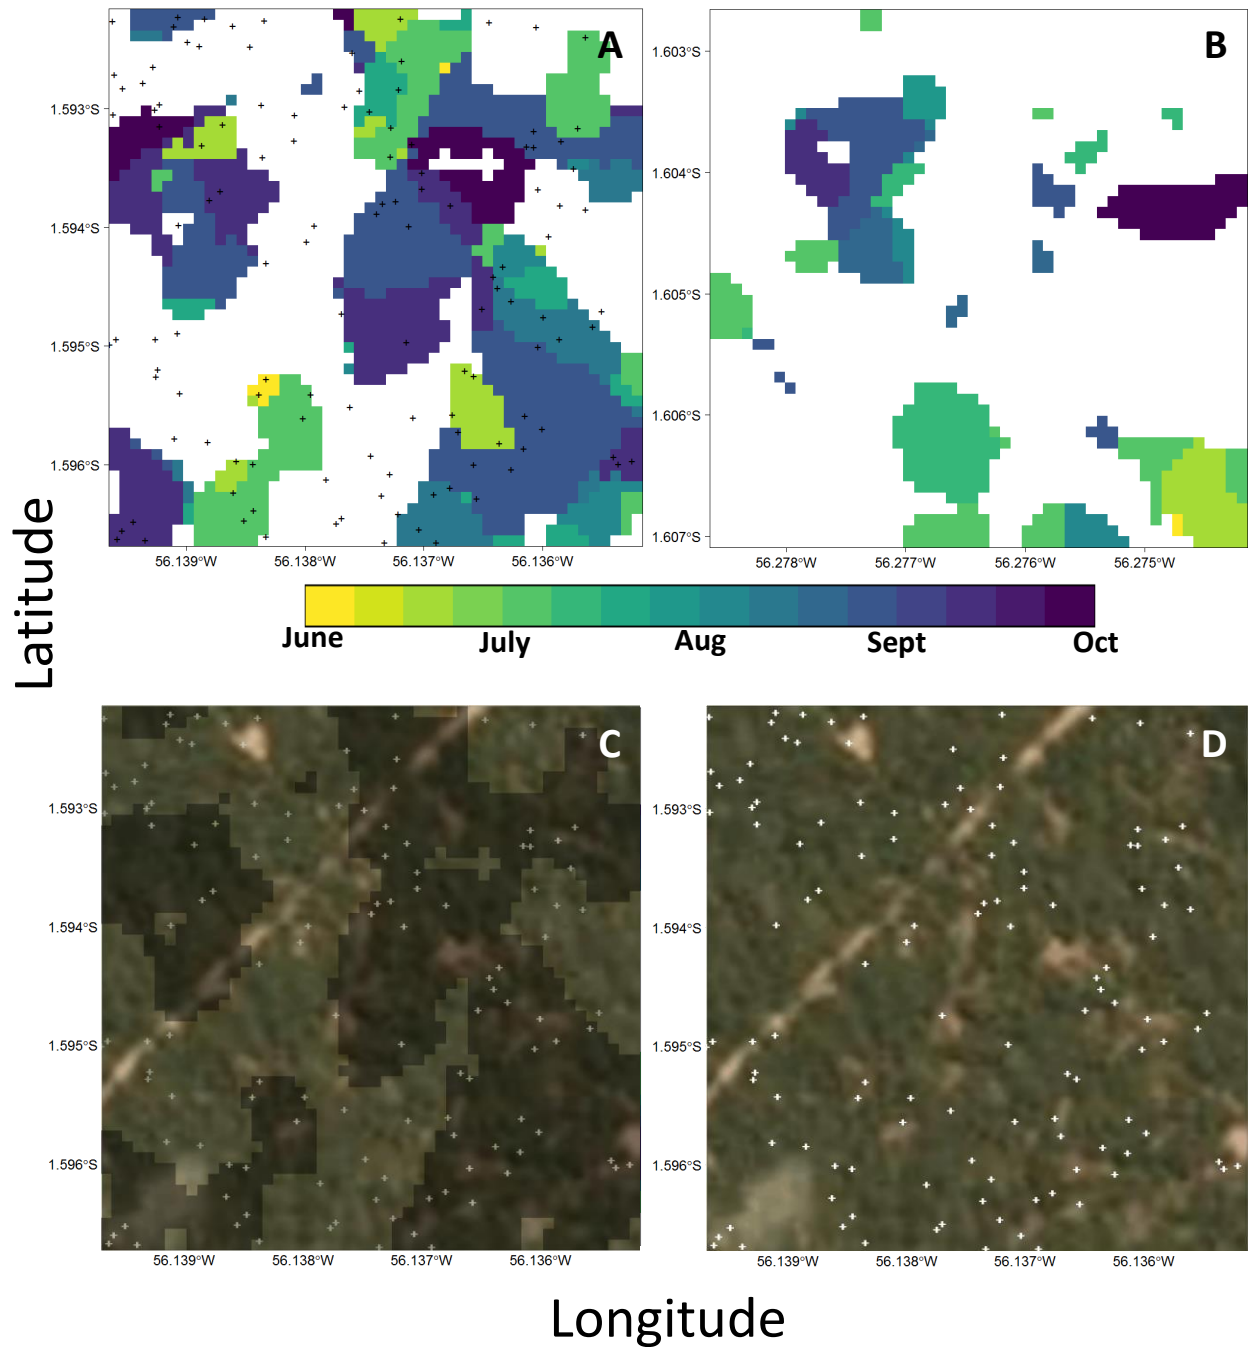

**Figure 8.** Map of predicted breakpoint dates for two 500m X 500m test regions, one logged (A) and one unlogged (B), in the Saraca National Forest, Para, Brazil. Logged tree locations are black crosses and the date of the breakpoint for each pixel is color coded by week, with white representing no breakpoint. Planet imagery (3 m) from 28 August 2017 overlaid with and without breakpoint locations (C and D) for the logged area (trees in white). Approximately 54% and 21% of the pixels in the logged and unlogged regions had breakpoints, respectively.

404

405

406

## 407 **5. Discussion**

408 We present the first multi-sensor comparison of SAR data for monitoring a range of selective logging  
409 intensities in the tropics. We demonstrated that L-band PALSAR-2, C-band RADARSAT-2, and C-  
410 band Sentinel-1 data performed inadequately at detecting tropical selective logging when using pixel-  
411 based attributes for classification. However, when analysing a time series of Sentinel-1 texture  
412 measures, logged pixels displayed a strong tendency for a breakpoint in their time series as the  
413 logging intensity of the FMU increased. Moreover, the timing associated with the identified  
414 breakpoint generally coincided with active logging at the highest logging intensities. Overall, our  
415 results suggest that Sentinel-1 data could be used to monitor the most intensive selective logging, but  
416 a time series approach would be required to detect change. A number of studies have used Sentinel-1  
417 time series data to monitor deforestation (Bouvet et al., 2018; Reiche et al., 2018a, 2018b), often in  
418 combination with optical data, however our study is the first to show it has the potential to be used  
419 exclusively to monitor selective logging.

420

### 421 *5.1. Variable importance*

422 In a number of cases the most important predictor variables from RF models involved the co-  
423 polarized channel (Figure S1), despite the generally accepted view that the cross polarized channel is  
424 best for detecting changes in forest cover (Joshi et al., 2016; Reiche et al., 2018a; Ryan et al., 2012;  
425 Shimada et al., 2014). The HH polarization of PALSAR-2 data has previously been shown to be  
426 sensitive to the early stages of deforestation, resulting from single-bounce scattering from felled trees  
427 (Watanabe et al., 2018). Our results support the idea that the co-polarized channel (for L- and C- band  
428 SAR) is useful and should not be ignored in forest disturbance detection analyses (e.g. Reiche et al.,  
429 2018a). While shorter wavelength SAR data, like C- and X-band, are known to be less sensitive to  
430 forest structure, because the radar signal mainly interacts with the forest canopy (Woodhouse, 2017;  
431 Flores-Anderson et al., 2019), the higher backscatter values in the co-polarized channel for all three  
432 sensors suggests predominantly rough surface backscattering from the forest canopy (as volume  
433 scattering generally results in roughly equal backscatter between co- and cross-polarized channels).  
434 This suggests that forest tracts subjected to more intensive selective logging than we studied



435 (conventional logging permits with larger canopy gaps, large road networks, and many log landing  
436 areas) should possess a signal in the co-polarized channel that could be used to detect changes in  
437 canopy cover and should not be discarded (e.g. Reiche et al., 2018a).

438 Random Forest models offer an objective approach to selecting important variables for use in  
439 time series analyses. The Mean Decrease in Accuracy rankings were used to select the sum average  
440 texture measure in the time series results, corroborate their rankings (see Figures 7 and S7). The  
441 detection rate was highest with the best, lower with the second best, and lower still with the third.  
442 SAR data often has fewer bands than optical data, for example, so the choice of which metric to use in  
443 time series analyses may be more straightforward. However, many studies do not compare the results  
444 among metrics to select an optimal, relying instead on supposition (e.g. Reiche et al., 2018a). Our  
445 findings suggest Mean Decrease in Accuracy is useful for variable selection, even if the Random  
446 Forest models themselves are of little practical use (e.g. Figure 3).

447

#### 448 *5.2. Texture measures and detecting selective logging*

449 In all cases the texture measures had the highest variable importance rankings (Figure S6). This  
450 corresponds with previous results with optical data, where detection of selective logging relied on the  
451 contextual information embodied within their calculation (Hethcoat et al. 2019). Similar to their  
452 results, the predictions of logging in our test areas were spatially correlated, presumably a  
453 consequence of the spatial window used in the calculation. Again, however, extra detections are  
454 expected from the accompanying forest disturbances associated with logging. Yet, in the context of  
455 accuracy assessment, an issue that has not received much attention within the remote sensing  
456 literature is how to report selective logging detections in the absence of robust field data on canopy  
457 gaps, roads networks, skid trails, log landing decks, etc. Others have shown that selective logging can  
458 be associated with 30-70% forest disturbance, despite the proportion of pixels having had a tree  
459 removed being closer to 10% (Asner et al., 2004, 2002; Putz et al., 2019), depending on the intensity  
460 and logging practices (reduced impact versus conventional). Clearly Figure 8A has false discoveries  
461 associated with the breakpoint detections, but some of the detections that do not occur at a tree  
462 location undoubtedly correspond with canopy gaps seen in the Planet imagery.

463           While the texture information clearly helped with detection of selective logging, a coherent  
464 understanding of what the sum average metric means, in terms of characterizing forest disturbances  
465 from selective logging or understanding the structural changes to forests associated with increasing  
466 and decreasing values, remains unknown. Attempts to generalize and interpret the meaning of textures  
467 have proven difficult over the years. However, some have suggested that high values in measures like  
468 variance, dissimilarity, entropy, and contrast were associated with visual edges whereas average,  
469 homogeneity, correlation, and angular second moment were associated with subtle irregular variations  
470 from continuous regions like forests or water (Hall-Beyer, 2017). More work is needed to understand  
471 the interpretation of textures measures that are so often employed in remote sensing classifications.

472

### 473 *5.3. Combining sensors for classification*

474 We chose not to combine any of the data types used here, partly because the inconsistent spatial and  
475 temporal coverage precluded such an analysis, but also because we wanted to assess the detection  
476 capabilities of each sensor on its own. Methods that combine data from multiple sensors (both other  
477 SAR platforms and/or optical data from Landsat or Sentinel-2) would likely perform better,  
478 corresponding with results for monitoring deforestation (Mercier et al., 2019; Reiche et al., 2018b,  
479 2016, 2015). Indeed, prior work with Landsat data has shown strong detection of selective logging at  
480 similar intensities (Hethcoat et al., 2019), yet this work sought to establish a baseline with the SAR  
481 sensors available. The general direction and momentum for the advancement of detecting subtle forest  
482 disturbances from spaceborne SAR will likely require time series, polarimetric, and data fusion  
483 approaches, particularly in light of our findings that pixel-based differences between logged and  
484 unlogged areas with SAR backscatter alone cannot do the job effectively.

485

### 486 *5.4. Longer time series in the tropics*

487 Sentinel-1A began acquiring imagery regularly (approximately every 12 days) in late 2016 for most  
488 of Brazil, with Sentinel-1B following in late 2018. Consequently, a time series assessment was only  
489 possible for a single calendar year (roughly 2017) with the logging data sets we had access to. The  
490 BFAST algorithm is generally flexible and can be tuned with a baseline period if sufficient data are

491 available, enabling assessments of longer and more variable time series (Verbesselt et al., 2010). The  
492 limited time series available is likely the reason many breakpoints for the less intensively logged sites  
493 occurred in December, presumably with the onset of the rainy season in earnest and an uptick in  
494 backscatter associated with moisture. Our analysis, however, was limited to a simpler test of one or no  
495 breakpoints – future work should explore how longer time series might improve detection of lower  
496 intensity logging, where seasonal patterns in backscatter can be established as a baseline to help  
497 reduce false alarms.

498

## 499 **6. Conclusion**

500 Tropical selective logging is fundamentally connected to global climate, biodiversity conservation,  
501 and human wellbeing (Lewis et al., 2015). Selective logging is often the first disturbance to affect  
502 primary forest (Asner et al., 2009), with road networks and ease of access facilitating further  
503 disturbances (e.g. increased fires, hunting or illegal logging). Efforts to detect and map selective  
504 logging with Sentinel-1, because of its global coverage and anticipated continuation missions (i.e.  
505 Sentinel-1C and D), are urgently needed to understand the capabilities this data stream might offer at  
506 advancing detection of tropical selective logging activities. With the successful launch of SAOCOM  
507 1A in late 2018, the planned continuation of Sentinel-1 (with C and D), the opening of the ALOS  
508 PALSAR-1 archives, and the anticipated launches of SAOCOM 1B in 2019 and NISAR in 2021, an  
509 immense volume of freely available C- and L-band SAR data will, hopefully, usher in a new era of  
510 forest monitoring from space with SAR data. Our findings suggest that time series methods should be  
511 effective at detecting the most intensive selective logging in the Amazon with these data sets.  
512 Moreover, if a distinct dry season is characteristic of the study region, focusing detecting during this  
513 time frame can further bolster detection by removing false positive detections associated with  
514 seasonal rainfall.

515

516

517

518

519 **Acknowledgements**

520 MGH was funded by the Grantham Centre for Sustainable Futures. JMBC was funded by  
521 the Natural Environment Research Council (Agreement PR140015 between NERC and the National  
522 Centre for Earth Observation). RADARSAT-2 imagery was provided by MDA through an ESA  
523 agreement under proposal 126091 and PALSAR-2 imagery was provided by JAXA. We would like to  
524 thank Planet Labs for access to imagery through the education and outreach program.

525

526 **7. References**

- 527 Antropov, O., Rauste, Y., Vaananen, A., Mutanen, T., Hame, T., 2016. Mapping forest disturbance  
528 using long time series of Sentinel-1 data: Case studies over boreal and tropical forests, in: 2016  
529 IEEE International Geoscience and Remote Sensing Symposium (IGARSS). IEEE, pp. 3906–  
530 3909. doi:10.1109/IGARSS.2016.7730014
- 531 Asner, G.P., Keller, M., Pereira, Jr, R., Zweede, J.C., Silva, J.N.M., 2004. Canopy damage and  
532 recovery after selective logging in Amazonia: Field and satellite studies. *Ecol. Appl.* 14, 280–  
533 298. doi:10.1890/01-6019
- 534 Asner, G.P., Keller, M., Pereira, R., Zweede, J.C., 2002. Remote sensing of selective logging in  
535 Amazonia. *Remote Sens. Environ.* 80, 483–496. doi:10.1016/S0034-4257(01)00326-1
- 536 Asner, G.P., Rudel, T.K., Aide, T.M., Defries, R., Emerson, R., 2009. A Contemporary Assessment of  
537 Change in Humid Tropical Forests. *Conserv. Biol.* 23, 1386–1395. doi:10.1111/j.1523-  
538 1739.2009.01333.x
- 539 Baccini, A., Walker, W., Carvalho, L., Farina, M., Sulla-Menashe, D., Houghton, R.A., 2017.  
540 Tropical forests are a net carbon source based on aboveground measurements of gain and loss.  
541 *Science* (80-. ). 358, 230–234. doi:10.1126/science.aam5962
- 542 Barlow, J., Lennox, G.D., Ferreira, J., Berenguer, E., Lees, A.C., Nally, R. Mac, Thomson, J.R.,  
543 Ferraz, S.F.D.B., Louzada, J., Oliveira, V.H.F., Parry, L., Ribeiro de Castro Solar, R., Vieira,  
544 I.C.G., Aragão, L.E.O.C., Begotti, R.A., Braga, R.F., Cardoso, T.M., Jr, R.C.D.O., Souza Jr,  
545 C.M., Moura, N.G., Nunes, S.S., Siqueira, J.V., Pardini, R., Silveira, J.M., Vaz-de-Mello, F.Z.,  
546 Veiga, R.C.S., Venturieri, A., Gardner, T.A., 2016. Anthropogenic disturbance in tropical forests

- 547 can double biodiversity loss from deforestation. *Nature* 535, 144–147. doi:10.1038/nature18326
- 548 Benjamini, Y., Hochberg, Y., 1995. Controlling the False Discovery Rate: A Practical and Powerful  
549 Approach to Multiple Testing. *J. R. Stat. Soc. Ser. B* 57, 289–300.
- 550 Bouvet, A., Mermoz, S., Ballère, M., Koleček, T., Le Toan, T., 2018. Use of the SAR Shadowing  
551 Effect for Deforestation Detection with Sentinel-1 Time Series. *Remote Sens.* 10, 1250.  
552 doi:10.3390/rs10081250
- 553 Breiman, L., 2001a. Random Forests. *Mach. Learn.* 45, 5–32. doi:10.1023/A:1010933404324
- 554 Breiman, L., 2001b. Statistical Modeling: The Two Cultures. *Stat. Sci.* 16, 199–231.
- 555 Bullock, E.L., Woodcock, C.E., Olofsson, P., 2018. Monitoring tropical forest degradation using  
556 spectral unmixing and Landsat time series analysis. *Remote Sens. Environ.* 110968.  
557 doi:10.1016/j.rse.2018.11.011
- 558 Curtis, P.G., Slay, C.M., Harris, N.L., Tyukavina, A., Hansen, M.C., 2018. Classifying drivers of  
559 global forest loss. *Science* (80-. ). 361, 1108–1111. doi:10.1126/science.aau3445
- 560 Delgado-Aguilar, M.J., Fassnacht, F.E., Peralvo, M., Gross, C.P., Schmitt, C.B., 2017. Potential of  
561 TerraSAR-X and Sentinel 1 imagery to map deforested areas and derive degradation status in  
562 complex rain forests of Ecuador. *Int. For. Rev.* 19, 102–118. doi:10.1505/146554817820888636
- 563 Deutscher, J., Perko, R., Gutjahr, K., Hirschmugl, M., Schardt, M., 2013. Mapping Tropical  
564 Rainforest Canopy Disturbances in 3D by COSMO-SkyMed Spotlight InSAR-Stereo Data to  
565 Detect Areas of Forest Degradation. *Remote Sens.* 5, 648–663. doi:10.3390/rs5020648
- 566 Flores-Anderson, A.I., Herndon, K.E., Thapa, R.B., Cherrington, E. (Eds.), 2019. *The SAR  
567 Handbook: Comprehensive Methodologies for Forest Monitoring and Biomass Estimation.*  
568 NASA. doi:10.25966/nr2c-s697
- 569 Gorelick, N., Hancher, M., Dixon, M., Ilyushchenko, S., Thau, D., Moore, R., 2017. Google Earth  
570 Engine: Planetary-scale geospatial analysis for everyone. *Remote Sens. Environ.* 202, 18–27.  
571 doi:10.1016/j.rse.2017.06.031
- 572 Hall-Beyer, M., 2017. Practical guidelines for choosing GLCM textures to use in landscape  
573 classification tasks over a range of moderate spatial scales. *Int. J. Remote Sens.* 38, 1312–1338.  
574 doi:10.1080/01431161.2016.1278314

- 575 Hansen, M.C., Potapov, P. V, Moore, R., Hancher, M., Turubanova, S.A., Tyukavina, A., Thau, D.,  
576 Stehman, S. V., Goetz, S.J., Loveland, T.R., Kommareddy, A., Egorov, A., Chini, L., Justice,  
577 C.O., Townshend, J.R.G., 2013. High-Resolution Global Maps of 21st-Century Forest Cover  
578 Change. *Science* (80-. ). 342, 850–853. doi:10.1126/science.1244693
- 579 Hethcoat, M., Edwards, D., Carreiras, J., Bryant, R., França, F., Quegan, S., 2019. A machine learning  
580 approach to map tropical selective logging. *Remote Sens. Environ.* 221, 569–582.  
581 doi:10.1016/j.rse.2018.11.044
- 582 Hosonuma, N., Herold, M., De Sy, V., De Fries, R.S., Brockhaus, M., Verchot, L., Angelsen, A.,  
583 Romijn, E., 2012. An assessment of deforestation and forest degradation drivers in developing  
584 countries. *Environ. Res. Lett.* 7, 044009. doi:10.1088/1748-9326/7/4/044009
- 585 Hussain, M., Chen, D., Cheng, A., Wei, H., Stanley, D., 2013. Change detection from remotely sensed  
586 images: From pixel-based to object-based approaches. *ISPRS J. Photogramm. Remote Sens.* 80,  
587 91–106. doi:10.1016/j.isprsjprs.2013.03.006
- 588 Joshi, N., Baumann, M., Ehammer, A., Fensholt, R., Grogan, K., Hostert, P., Jepsen, M., Kuemmerle,  
589 T., Meyfroidt, P., Mitchard, E.T.A., Reiche, J., Ryan, C., Waske, B., 2016. A Review of the  
590 Application of Optical and Radar Remote Sensing Data Fusion to Land Use Mapping and  
591 Monitoring. *Remote Sens.* 8, 70. doi:10.3390/rs8010070
- 592 Koch, B., 2010. Status and future of laser scanning, synthetic aperture radar and hyperspectral remote  
593 sensing data for forest biomass assessment. *ISPRS J. Photogramm. Remote Sens.* 65, 581–590.  
594 doi:10.1016/j.isprsjprs.2010.09.001
- 595 Lei, Y., Treuhaft, R., Keller, M., Dos-Santos, M., Gonçalves, F., Neumann, M., 2018. Quantification  
596 of selective logging in tropical forest with spaceborne SAR interferometry. *Remote Sens.*  
597 *Environ.* 211, 167–183. doi:10.1016/j.rse.2018.04.009
- 598 Lewis, S.L., Edwards, D.P., Galbraith, D., 2015. Increasing human dominance of tropical forests.  
599 *Science* (80-. ). 349, 827–832.
- 600 Liaw, A., Wiener, M., 2002. Classification and Regression by randomForest. *R News* 2, 18–22.
- 601 Mathieu, R., Naidoo, L., Cho, M.A., Leblon, B., Main, R., Wessels, K., Asner, G.P., Buckley, J., Van  
602 Aardt, J., Erasmus, B.F.N., Smit, I.P.J., 2013. Toward structural assessment of semi-arid African

603 savannahs and woodlands: The potential of multitemporal polarimetric RADARSAT-2 fine  
604 beam images. *Remote Sens. Environ.* 138, 215–231. doi:10.1016/j.rse.2013.07.011

605 Mercier, A., Betbeder, J., Rumiano, F., Baudry, J., Gond, V., Blanc, L., Bourgoïn, C., Cornu, G.,  
606 Ciudad, C., Marchamalo, M., Pocard-Chapuis, R., Hubert-Moy, L., 2019. Evaluation of  
607 Sentinel-1 and 2 Time Series for Land Cover Classification of Forest–Agriculture Mosaics in  
608 Temperate and Tropical Landscapes. *Remote Sens.* 11, 979. doi:10.3390/rs11080979

609 Mitchard, E.T.A., Saatchi, S.S., Woodhouse, I.H., Nangendo, G., Ribeiro, N.S., Williams, M., Ryan,  
610 C.M., Lewis, S.L., Feldpausch, T.R., Meir, P., 2009. Using satellite radar backscatter to predict  
611 above-ground woody biomass: A consistent relationship across four different African  
612 landscapes. *Geophys. Res. Lett.* 36, L23401. doi:10.1029/2009GL040692

613 Mitchell, A.L., Rosenqvist, A., Mora, B., 2017. Current remote sensing approaches to monitoring  
614 forest degradation in support of countries measurement, reporting and verification (MRV)  
615 systems for REDD+. *Carbon Balance Manag.* 12, 9. doi:10.1186/s13021-017-0078-9

616 Neuvial, P., Roquain, E., 2012. On false discovery rate thresholding for classification under sparsity.  
617 *Ann. Stat.* 40, 2572–2600. doi:10.1214/12-AOS1042

618 Putz, F.E., Baker, T., Griscom, B.W., Gopalakrishna, T., Roopsind, A., Umunay, P.M., Zalman, J.,  
619 Ellis, E.A., Ruslandi, Ellis, P.W., 2019. Intact Forest in Selective Logging Landscapes in the  
620 Tropics. *Front. For. Glob. Chang.* 2, 1–10. doi:10.3389/ffgc.2019.00030

621 Quegan, S., Yu, J.J., 2001. Filtering of multichannel SAR images. *IEEE Trans. Geosci. Remote Sens.*  
622 39, 2373–2379. doi:10.1109/36.964973

623 Reiche, J., Hamunyela, E., Verbesselt, J., Hoekman, D., Herold, M., 2018a. Improving near-real time  
624 deforestation monitoring in tropical dry forests by combining dense Sentinel-1 time series with  
625 Landsat and ALOS-2 PALSAR-2. *Remote Sens. Environ.* 204, 147–161.  
626 doi:10.1016/j.rse.2017.10.034

627 Reiche, J., Lucas, R., Mitchell, A.L., Verbesselt, J., Hoekman, D.H., Haarpaintner, J., Kellndorfer,  
628 J.M., Rosenqvist, A., Lehmann, E.A., Woodcock, C.E., Seifert, F.M., Herold, M., 2016.  
629 Combining satellite data for better tropical forest monitoring. *Nat. Clim. Chang.* 6, 120–122.  
630 doi:10.1038/nclimate2919

- 631 Reiche, J., Verbesselt, J., Hoekman, D., Herold, M., 2015. Fusing Landsat and SAR time series to  
632 detect deforestation in the tropics. *Remote Sens. Environ.* 156, 276–293.  
633 doi:10.1016/j.rse.2014.10.001
- 634 Reiche, J., Verhoeven, R., Verbesselt, J., Hamunyela, E., Wielaard, N., Herold, M., 2018b.  
635 Characterizing Tropical Forest Cover Loss Using Dense Sentinel-1 Data and Active Fire Alerts.  
636 *Remote Sens.* 10, 777. doi:10.3390/rs10050777
- 637 Ryan, C.M., Hill, T., Woollen, E., Ghee, C., Mitchard, E.T.A., Cassells, G., Grace, J., Woodhouse,  
638 I.H., Williams, M., 2012. Quantifying small-scale deforestation and forest degradation in  
639 African woodlands using radar imagery. *Glob. Chang. Biol.* 18, 243–257. doi:10.1111/j.1365-  
640 2486.2011.02551.x
- 641 Saatchi, S., Marlier, M., Chazdon, R.L., Clark, D.B., Russell, A.E., 2011. Impact of spatial variability  
642 of tropical forest structure on radar estimation of aboveground biomass. *Remote Sens. Environ.*  
643 115, 2836–2849. doi:10.1016/j.rse.2010.07.015
- 644 Shimada, M., Itoh, T., Motooka, T., Watanabe, M., Shiraishi, T., Thapa, R., Lucas, R., 2014. New  
645 global forest/non-forest maps from ALOS PALSAR data (2007–2010). *Remote Sens. Environ.*  
646 155, 13–31. doi:10.1016/j.rse.2014.04.014
- 647 Tyukavina, A., Hansen, M.C., Potapov, P. V., Stehman, S. V., Smith-Rodriguez, K., Okpa, C.,  
648 Aguilar, R., 2017. Types and rates of forest disturbance in Brazilian Legal Amazon, 2000–2013.  
649 *Sci. Adv.* 3, e1601047. doi:10.1126/sciadv.1601047
- 650 Verbesselt, J., Hyndman, R., Newnham, G., Culvenor, D., 2010. Detecting trend and seasonal changes  
651 in satellite image time series. *Remote Sens. Environ.* 114, 106–115.  
652 doi:10.1016/j.rse.2009.08.014
- 653 Verbesselt, J., Zeileis, A., Herold, M., 2012. Near real-time disturbance detection using satellite image  
654 time series. *Remote Sens. Environ.* 123, 98–108. doi:10.1016/j.rse.2012.02.022
- 655 Watanabe, M., Koyama, C.N., Hayashi, M., Nagatani, I., Shimada, M., 2018. Early-Stage  
656 Deforestation Detection in the Tropics With L-band SAR. *IEEE J. Sel. Top. Appl. Earth Obs.*  
657 *Remote Sens.* 11, 2127–2133. doi:10.1109/JSTARS.2018.2810857
- 658 Zhu, Z., 2017. Change detection using landsat time series: A review of frequencies, preprocessing,



659 algorithms, and applications. ISPRS J. Photogramm. Remote Sens. 130, 370–384.

660 doi:10.1016/j.isprsjprs.2017.06.013

661 Woodhouse, I.H. Introduction to microwave remote sensing. CRC press, 2017.

662

663

664
